# Supplementary material
Source: PubMed Central journal article supplement (PMC2898586)
Supplement: JCI40767sd.pdf [file JCI40767sd.pdf]

## Materials and Methods

**Reduced intensity conditioning with busulfan in the macaque.** Two macaques were treated with intravenous busulfan to observe the hematological effects of such treatment and to obtain pharmacokinetic data (e.g., area under the curve [AUC] and concentration at steady-state [C<sub>ss</sub>], which is AUC divided by the dosing interval see **Supplemental Table 3**). For busulfan analysis, 3 mL of whole blood was collected prior to infusion, at the end of infusion, 15 minutes after the end of infusion, and also at 4, 5, 6, and 8 hours after the start of infusion on both treatment days. Blood samples were centrifuged at 450×g for 15 minutes to collect serum. Serum samples were stored at negative 80°C until transportation to the Pharmacokinetics Laboratory at Seattle Cancer Care Alliance for analysis. Each specimen subsequently underwent derivatization and extraction processes carried out by using sodium iodide solution and ethyl acetate, respectively. After 30 minutes of incubation and agitation, the parts of organic phase were transferred to individual vials for gas chromatography-mass spectrometry device (GC-MSD) quantification (Agilent Technologies, GC: 6890N; MSD: 5973). The concentration versus time data is plotted by using the pharmacokinetics program WinNonLin (Pharsight Corp. Mountain View, CA). Both non-compartmental and compartmental models were used to find the best fit of the data set and estimate the AUC and C<sub>ss</sub> of busulfan exposures of the animals. The first monkey (K03232) was given a dose of busulfan of 4 mg/kg on two consecutive mornings and as a result there was pronounced neutropenia and thrombocytopenia (data not shown). K03232 was euthanized 18 days after the first dose of busulfan due to pronounced cytopenia. Due to the neutropenia and thrombocytopenia observed in K03232, the second monkey (M05181) was given a decreased dose of busulfan of 2 mg/kg on two consecutive mornings. In M05181 there was again pronounced cytopenia, but not as severe as that observed in M05181 (data not shown).

The first experimental monkey K05079 weighed 6.0 kg at treatment and was given a busulfan dose of 4 mg/kg on two consecutive mornings (total dose = 24.0 mg each day). The first and second doses of busulfan produced an AUC of 4842  $\mu\text{M}\cdot\text{min}$  and 4977  $\mu\text{M}\cdot\text{min}$ , and a

C<sub>ss</sub> of 828 ng/ml and 851 ng/ml, respectively. The median busulfan clearance was 3.57 ml/min/kg (range: 3.26–3.92) and median half-life was 2.35 hours (range: 2.17–2.97).

**Supplemental Table 1. Gene marking before first drug treatment**

| <b>Monkey</b> | <b>Conditioning</b>                 | <b>Vector</b>                 | <b>Days After<br/>Transplantation of 1<sup>st</sup><br/>Drug Treatment</b> | <b>PBL Gene Marking<br/>(%) Before 1<sup>st</sup> Drug<br/>Treatment</b> |
|---------------|-------------------------------------|-------------------------------|----------------------------------------------------------------------------|--------------------------------------------------------------------------|
| <b>M00228</b> | 1020cGy TBI                         | Gammaretrovirus (MND-<br>MFG) | 251                                                                        | 10.5                                                                     |
| <b>M01044</b> | 1020cGy TBI                         | Gammaretrovirus<br>(MSCV)     | 221                                                                        | 14.8                                                                     |
| <b>M01277</b> | 1020cGy TBI                         | Gammaretrovirus (MND-<br>MFG) | 434                                                                        | 8.5                                                                      |
| <b>J02370</b> | 800cGy TBI                          | HIV-derived lentivirus        | 510                                                                        | 14.1                                                                     |
| <b>T04228</b> | 800cGy TBI                          | HIV-derived lentivirus        | 574                                                                        | 17.2                                                                     |
| <b>M05189</b> | 900cGy TBI                          | HIV-derived lentivirus        | 253                                                                        | 5.2                                                                      |
| <b>J02043</b> | 1020cGy TBI                         | HIV-derived lentivirus        | 177                                                                        | 65.6*                                                                    |
| <b>M02426</b> | 800cGy TBI                          | Gammaretrovirus (MND)         | 140                                                                        | 4.4*                                                                     |
| <b>K05079</b> | Busulfan<br>4 mg/kg/day (2<br>days) | HIV-derived lentivirus        | 56                                                                         | 4.4*                                                                     |

PBL=peripheral blood

TBI=total body irradiation

\*percent gene marking approximated from provirus copy number

**Supplemental Table 2. Drug Treatment in Nonhuman Primates**

| <b>Animal</b>                            | <b>DPT</b> | <b>O<sup>6</sup>BG<br/>mg/m<sup>2</sup></b> | <b>BCNU mg/m<sup>2</sup></b> | <b>TMZ<br/>mg/m<sup>2</sup></b> |
|------------------------------------------|------------|---------------------------------------------|------------------------------|---------------------------------|
| <b>Baboons-<i>Papio cynocephalus</i></b> |            |                                             |                              |                                 |
| <b>M01044</b>                            | 221        | 120                                         | --                           | 400                             |
|                                          | 250        | 120                                         | --                           | 600                             |
|                                          | 290        | 120                                         | --                           | 800                             |
|                                          | 326        | 120*                                        | --                           | 800                             |
|                                          | 382        | 120*                                        | --                           | 1000                            |
|                                          | 438        | 120*                                        | --                           | 1100                            |
|                                          | 894        | 120*                                        | 30 <sup>†</sup>              | --                              |
| <b>M00228</b>                            | 251        | 120                                         | --                           | 600                             |
|                                          | 303        | 120*                                        | --                           | 800                             |
|                                          | 318        | 120*                                        | --                           | 1000                            |
|                                          | 355        | 120*                                        | --                           | 1200                            |
|                                          | 383        | 120*                                        | --                           | 1400                            |
|                                          | 411        | 120*                                        | 40 <sup>†</sup>              | --                              |
| <b>M01277</b>                            | 434        | 120*                                        | 40 <sup>†</sup>              | --                              |
|                                          | 677        | 120*                                        | 20                           | --                              |
| <b>Macaque-<i>Macaca nemestrina</i></b>  |            |                                             |                              |                                 |
| <b>J02043</b>                            | 177        | 120*                                        | 20 <sup>†</sup>              | --                              |
|                                          | 292        | 120*                                        | 30 <sup>†</sup>              | --                              |
| <b>J02370</b>                            | 510        | 120*                                        | 15                           | --                              |
|                                          | 888        | 120*                                        | 20                           | --                              |
| <b>T04228</b>                            | 574        | 120*                                        | 20                           | --                              |
| <b>M05189</b>                            | 253        | 120*                                        | 17.5                         | --                              |
|                                          | 322        | 120*                                        | 25                           | --                              |

|               |     |      |    |    |
|---------------|-----|------|----|----|
|               | 510 | 120* | 25 | -- |
| <b>K05079</b> | 56  | 120* | 25 | -- |
| <b>M02426</b> | 140 | 120* | 15 | -- |
|               | 264 | 120* | 20 | -- |
|               | 449 | 120* | 30 | -- |
|               | 588 | 120* | 30 | -- |

---

DPT= days post-transplant

\*Fractionated dose of 120 mg/m<sup>2</sup> O<sup>6</sup>BG (O<sup>6</sup>BG-2X) given prior to and 7-8 hours after BCNU or TMZ

†BCNU purchased from Bristol-Myers Squibb

**Supplemental Table 3. Pharmacokinetics of conditioning with busulfan**

| <b>Monkey</b> | <b>Weight</b> | <b>Dose</b>        | <b>Weight-</b>       | <b>AUC #1</b>                                    | <b>Css #1</b>  | <b>AUC #2</b>                                    | <b>Css #2</b>  |
|---------------|---------------|--------------------|----------------------|--------------------------------------------------|----------------|--------------------------------------------------|----------------|
|               | <b>(kg)</b>   | <b>(mg/kg/day)</b> | <b>Adjusted Dose</b> | <b>(<math>\mu\text{M}\cdot\text{min}</math>)</b> | <b>(ng/ml)</b> | <b>(<math>\mu\text{M}\cdot\text{min}</math>)</b> | <b>(ng/ml)</b> |
|               |               |                    | <b>(mg/day)</b>      |                                                  |                |                                                  |                |
| <b>K03232</b> | 6.8           | 4                  | 27.2                 | 4122                                             | 705            | 4297                                             | 735            |
| <b>M05181</b> | 4.1           | 2                  | 8.2                  | 2268                                             | 388            | 2276                                             | 389            |
| <b>K05079</b> | 6.0           | 4                  | 24                   | 4842                                             | 828            | 4977                                             | 851            |

\*AUC and Css values from the last (4<sup>th</sup>) dose of busulfan

**Supplemental Table 4. Closest proto-oncogene promoter to unique RIS before drug treatment**

| Gene Abbreviation | RefSeq              | Monkey        | Distance (bp) |
|-------------------|---------------------|---------------|---------------|
| MCL1              | NM_021960           | J02370        | 380           |
| <b>ZNF384</b>     | <b>NM_001039917</b> | <b>J02043</b> | <b>854</b>    |
| ZNF644            | NM_032186           | J02043        | 2666          |
| <b>FGFR1OP</b>    | <b>NM_007045</b>    | <b>T04228</b> | <b>3083</b>   |
| <b>PTTG1IP</b>    | <b>NM_004339</b>    | <b>J02043</b> | <b>4965</b>   |
| <b>STK11</b>      | <b>NM_000455</b>    | <b>T04228</b> | <b>7726</b>   |
| <b>FSTL3</b>      | <b>NM_005860</b>    | <b>J02370</b> | <b>8510</b>   |
| GPX1              | NM_000581           | J02043        | 8778          |
| <b>PTPN6</b>      | <b>NM_080548</b>    | <b>J02043</b> | <b>11538</b>  |
| <b>NCAPD2</b>     | <b>NM_014865</b>    | <b>J02043</b> | <b>12639</b>  |
| <b>ICAM1</b>      | <b>NM_000201</b>    | <b>T04228</b> | <b>14061</b>  |
| <b>ZDHHC18</b>    | <b>NM_032283</b>    | <b>J02043</b> | <b>15290</b>  |
| <b>NOTCH1</b>     | <b>NM_017617</b>    | <b>J02370</b> | <b>15728</b>  |
| RUNX3             | NM_004350           | J02043        | 16085         |
| CREBBP            | NM_001079846        | J02043        | 21765         |
| PTMA              | NM_002823           | T04228        | 22291         |
| LYL1              | NM_005583           | J02370        | 23015         |
| SET               | NM_003011           | T04228        | 24248         |
| CUTL1             | NM_001913           | J02043        | 24418         |
| <b>NCAPD2</b>     | <b>NM_014865</b>    | <b>J02043</b> | <b>24513</b>  |
| <b>USP39</b>      | <b>NM_006590</b>    | <b>J02043</b> | <b>24718</b>  |
| IL6ST             | NM_002184           | J02043        | 25186         |
| LTB               | NM_002341           | T04228        | 25659         |
| PPP1R14B          | NM_138689           | J02370        | 28747         |
| GNA12             | NM_007353           | K05079        | 29511         |
| LTB               | NM_002341           | J02043        | 31621         |
| PPP1R14B          | NM_138689           | J02043        | 31889         |
| STAT5A            | NM_003152           | T04228        | 31950         |
| CCR1              | NM_001295           | M05189        | 33635         |
| SHC1              | NM_003029           | J02043        | 35297         |
| MPL               | NM_005373           | J02370        | 35530         |
| DDX6              | NM_004397           | J02043        | 36637         |
| TCIRG1            | NM_006019           | T04228        | 37903         |
| <b>USP3</b>       | <b>NM_006537</b>    | <b>J02043</b> | <b>39056</b>  |
| TAP2              | NM_018833           | J02043        | 42638         |
| FAM117A           | NM_030802           | J02043        | 45188         |
| TCIRG1            | NM_006019           | T04228        | 45354         |
| FRMD8             | NM_031904           | J02370        | 45817         |
| CNR2              | NM_001841           | J02043        | 48273         |
| ARNT              | NM_001668           | T04228        | 51599         |
| GPX1              | NM_000581           | J02043        | 51957         |
| TPM4              | NM_003290           | J02043        | 53448         |
| DTX2              | NM_020892           | J02370        | 53724         |
| SNX5              | NM_152227           | J02370        | 55429         |
| <b>DDX10</b>      | <b>NM_004398</b>    | <b>T04228</b> | <b>55928</b>  |
| MYH9              | NM_002473           | M05189        | 58446         |
| CHD3              | NM_001005271        | J02043        | 61021         |
| <b>NSD1</b>       | <b>NM_172349</b>    | <b>T04228</b> | <b>61286</b>  |
| <b>NFATC3</b>     | <b>NM_004555</b>    | <b>J02043</b> | <b>61713</b>  |
| LYL1              | NM_005583           | J02043        | 62057         |
| <b>NFAT5</b>      | <b>NM_006599</b>    | <b>J02370</b> | <b>62489</b>  |
| GFI1B             | NM_004188           | J02043        | 63754         |
| TP53              | NM_000546           | T04228        | 66853         |
| PDXK              | NM_003681           | M05189        | 67616         |
| SSBP4             | NM_001009998        | T04228        | 67652         |
| SPECC1            | NM_001033553        | J02043        | 71152         |
| BRD2              | NM_005104           | T04228        | 72728         |
| SMG6              | NM_017575           | J02043        | 73359         |
| <b>ARHGEF12</b>   | <b>NM_015313</b>    | <b>J02043</b> | <b>73620</b>  |
| AKAP13            | NM_006738           | J02043        | 73984         |
| RARG              | NM_000966           | M05189        | 74125         |
| <b>BLM</b>        | <b>NM_000057</b>    | <b>J02043</b> | <b>75073</b>  |
| <b>RUNX1</b>      | <b>NM_001754</b>    | <b>J02043</b> | <b>75664</b>  |

|               |                     |               |               |
|---------------|---------------------|---------------|---------------|
| TREML2        | NM_024807           | T04228        | 78370         |
| RGS19         | NM_001039467        | J02370        | 78622         |
| BRD2          | NM_005104           | J02043        | 79315         |
| GABPB2        | NM_005254           | J02370        | 80867         |
| HMGCR         | NM_000859           | J02370        | 81310         |
| CCR7          | NM_001838           | J02370        | 82911         |
| JUNB          | NM_002229           | J02043        | 88158         |
| DNAL4         | NM_005740           | M05189        | 89053         |
| DNAL4         | NM_005740           | J02043        | 92022         |
| TRAF1         | NM_005658           | J02370        | 92876         |
| CIRBP         | NM_001280           | J02370        | 93373         |
| <b>NSD1</b>   | <b>NM_172349</b>    | <b>T04228</b> | <b>98631</b>  |
| PEAR1         | NM_001080471        | J02370        | 102865        |
| COX19         | NM_001031617        | T04228        | 107217        |
| PTBP1         | NM_002819           | M05189        | 112017        |
| EDG6          | NM_003775           | M05189        | 112861        |
| SEPT5         | NM_002688           | J02043        | 114973        |
| POU2F2        | NM_002698           | J02043        | 125232        |
| RHOF          | NM_019034           | T04228        | 125728        |
| <b>RUNX2</b>  | <b>NM_001015051</b> | <b>J02043</b> | <b>130327</b> |
| <b>TIAM1</b>  | <b>NM_003253</b>    | <b>J02370</b> | <b>130370</b> |
| RHOF          | NM_019034           | J02043        | 136355        |
| MCL1          | NM_021960           | J02370        | 137498        |
| TNFRSF8       | NM_001243           | T04228        | 138632        |
| NFIC          | NM_205843           | J02370        | 141024        |
| ENC1          | NM_003633           | J02370        | 141104        |
| ICAM1         | NM_000201           | M05189        | 141544        |
| PTBP1         | NM_002819           | J02043        | 149750        |
| CRIP2         | NM_001312           | T04228        | 156540        |
| TCL1A         | NM_001098725        | T04228        | 157736        |
| RGS19         | NM_001039467        | J02370        | 160136        |
| DST           | NM_183380           | J02043        | 164786        |
| GSPT1         | NM_002094           | J02043        | 165311        |
| PPP1R1A       | NM_006741           | J02370        | 167005        |
| STX4          | NM_004604           | J02370        | 171589        |
| RARA          | NM_000964           | J02043        | 172490        |
| MAP4K2        | NM_004579           | J02370        | 179693        |
| GRAP2         | NM_004810           | J02370        | 180905        |
| SLAMF6        | NM_052931           | J02043        | 181188        |
| SCAMP4        | NM_079834           | T04228        | 182585        |
| FANCE         | NM_021922           | J02370        | 185956        |
| SYDE1         | NM_033025           | M05189        | 199033        |
| MUC1          | NM_001018016        | J02043        | 201224        |
| FLT3          | NM_004119           | J02043        | 206900        |
| DHRS3         | NM_004753           | J02043        | 210661        |
| <b>RNF216</b> | <b>NM_207111</b>    | <b>J02043</b> | <b>212299</b> |
| MAFB          | NM_005461           | T04228        | 212752        |
| MUC1          | NM_001018016        | J02043        | 216651        |
| FBXL10        | NM_032590           | J02043        | 217561        |
| CRIP2         | NM_001312           | M05189        | 218041        |
| DHRS3         | NM_004753           | J02043        | 218367        |
| ACSL6         | NM_001009185        | J02043        | 221094        |
| BATF          | NM_006399           | J02043        | 221653        |
| LTB           | NM_002341           | M05189        | 222159        |
| SCAMP4        | NM_079834           | J02370        | 222289        |
| DTX3          | NM_178502           | J02370        | 227049        |
| DNAL4         | NM_005740           | J02043        | 228971        |
| GRAP2         | NM_004810           | J02043        | 230784        |
| RARG          | NM_000966           | T04228        | 233756        |
| CCR1          | NM_001295           | J02043        | 237606        |
| NFKB2         | NM_002502           | J02370        | 243019        |
| EPHA2         | NM_004431           | J02370        | 244865        |
| SYDE1         | NM_033025           | J02043        | 245870        |
| HIST1H4I      | NM_003495           | J02043        | 247255        |
| NCKIPSD       | NM_016453           | J02043        | 259535        |
| SLC19A1       | NM_194255           | J02043        | 260195        |



|               |                  |               |               |
|---------------|------------------|---------------|---------------|
| CCND2         | NM_001759        | J02043        | 265576        |
| RARG          | NM_000966        | J02043        | 266797        |
| PPP1R1A       | NM_006741        | J02043        | 271180        |
| LTB           | NM_002341        | J02370        | 271368        |
| RGS19         | NM_001039467     | J02043        | 271631        |
| PFN1          | NM_005022        | J02043        | 275444        |
| BATF          | NM_006399        | J02370        | 275789        |
| ICAM1         | NM_000201        | J02043        | 279483        |
| SYDE1         | NM_033025        | J02043        | 282568        |
| TPM3          | NM_001043351     | J02370        | 283644        |
| RHOF          | NM_019034        | J02043        | 286323        |
| MYH9          | NM_002473        | J02370        | 305218        |
| RGS19         | NM_001039467     | J02370        | 309950        |
| NFIC          | NM_205843        | J02370        | 312115        |
| NFIC          | NM_205843        | J02043        | 312358        |
| NSD1          | NM_172349        | J02043        | 317920        |
| LTB           | NM_002341        | J02043        | 318399        |
| LTB           | NM_002341        | M05189        | 328198        |
| IFNGR2        | NM_005534        | J02043        | 330324        |
| <b>RNF216</b> | <b>NM_207111</b> | <b>J02043</b> | <b>342825</b> |
| RHCG          | NM_016321        | J02043        | 343117        |
| TAP2          | NM_018833        | J02043        | 345372        |
| PDXK          | NM_003681        | J02043        | 352855        |
| EPOR          | NM_000121        | J02370        | 355413        |
| RHOF          | NM_019034        | J02043        | 357782        |
| CLTC          | NM_004859        | J02043        | 358070        |
| SFPQ          | NM_005066        | M05189        | 361885        |
| SLC16A3       | NM_004207        | J02043        | 364570        |
| MCL1          | NM_021960        | J02043        | 364738        |
| E2F3          | NM_001949        | J02370        | 375535        |
| <b>TFAP4</b>  | <b>NM_003223</b> | <b>J02043</b> | <b>386881</b> |
| FANCA         | NM_000135        | J02370        | 386981        |
| PIM3          | NM_001001852     | J02043        | 393400        |
| ICAM1         | NM_000201        | K05079        | 393422        |
| BCL10         | NM_003921        | J02043        | 397632        |
| NFATC3        | NM_004555        | J02043        | 402153        |
| FGR           | NM_005248        | J02043        | 405654        |
| SCAMP4        | NM_079834        | T04228        | 409291        |
| FANCG         | NM_004629        | J02370        | 409475        |
| TCIRG1        | NM_006019        | J02043        | 421180        |
| TOB2          | NM_016272        | J02370        | 423194        |
| DST           | NM_183380        | M05189        | 427228        |
| RAP1A         | NM_001010935     | J02043        | 427471        |
| GPX1          | NM_000581        | J02043        | 431627        |
| MYST4         | NM_012330        | J02043        | 435425        |
| PPP1CC        | NM_002710        | M05189        | 438875        |
| RGS19         | NM_001039467     | J02043        | 455836        |
| EML4          | NM_019063        | J02370        | 456961        |
| E2F3          | NM_001949        | J02043        | 457207        |
| BMI1          | NM_005180        | J02370        | 458658        |
| TCIRG1        | NM_006019        | K05079        | 463651        |
| WHSC1L1       | NM_023034        | J02043        | 465229        |
| SUSD3         | NM_145006        | K05079        | 465922        |
| FBXW4         | NM_022039        | J02043        | 476946        |
| MAF           | NM_001031804     | J02043        | 478709        |
| SLC38A1       | NM_030674        | T04228        | 478909        |
| PLEKHG2       | NM_022835        | J02043        | 485928        |
| PPP1R14B      | NM_138689        | T04228        | 500201        |
| CORO2B        | NM_006091        | J02043        | 500834        |
| GLB1          | NM_000404        | J02043        | 503196        |
| BRD2          | NM_005104        | J02043        | 504009        |
| MLLT1         | NM_005934        | J02043        | 505034        |
| ICAM1         | NM_000201        | T04228        | 506700        |
| SLC26A11      | NM_173626        | J02043        | 510013        |
| PIM3          | NM_001001852     | M05189        | 510847        |
| EPS15         | NM_001981        | M05189        | 513310        |

|          |              |        |        |
|----------|--------------|--------|--------|
| MAP3K8   | NM_005204    | J02043 | 521694 |
| FLI1     | NM_002017    | J02043 | 525858 |
| MYCN     | NM_005378    | J02043 | 528945 |
| LMO1     | NM_002315    | J02370 | 530143 |
| MEF2D    | NM_005920    | J02043 | 532490 |
| WHSC1L1  | NM_023034    | J02043 | 535767 |
| MMP14    | NM_004995    | J02043 | 539760 |
| PPP1R14B | NM_138689    | J02043 | 541053 |
| MAP3K8   | NM_005204    | T04228 | 542414 |
| TP53     | NM_000546    | M05189 | 554625 |
| TFRC     | NM_001128148 | J02043 | 558546 |
| GNAI2    | NM_002070    | J02043 | 561612 |
| LTB      | NM_002341    | T04228 | 565093 |
| MCL1     | NM_021960    | J02043 | 567554 |
| MLL1     | NM_005934    | J02370 | 572359 |
| SCYL1    | NM_020680    | J02043 | 573318 |
| FANCG    | NM_004629    | M05189 | 574866 |
| SMG6     | NM_017575    | J02043 | 579496 |
| SMG6     | NM_017575    | J02370 | 582565 |
| TP53RK   | NM_033550    | T04228 | 587288 |
| KCTD2    | NM_015353    | J02043 | 592625 |
| BMI1     | NM_005180    | J02043 | 595134 |
| NFKB1    | NM_003998    | J02043 | 601000 |
| UBL7     | NM_201265    | J02043 | 604135 |
| JUNB     | NM_002229    | T04228 | 608894 |
| JUNB     | NM_002229    | T04228 | 609360 |
| MUC1     | NM_001018016 | J02043 | 638094 |
| RPL22    | NM_000983    | J02043 | 638452 |
| KCTD2    | NM_015353    | J02370 | 638677 |
| KCTD2    | NM_015353    | J02370 | 638706 |
| FBXW4    | NM_022039    | J02043 | 644185 |
| COTL1    | NM_021149    | J02043 | 658602 |
| EDG6     | NM_003775    | M05189 | 663446 |
| FANCG    | NM_004629    | T04228 | 666065 |
| HSP90AB1 | NM_007355    | J02043 | 666129 |
| HEXIM1   | NM_006460    | M05189 | 677456 |
| RSPH10B  | NM_173565    | J02043 | 684037 |
| SOX8     | NM_014587    | J02043 | 684283 |
| SEPT9    | NM_006640    | J02043 | 697616 |
| EBF1     | NM_024007    | T04228 | 708688 |
| POU2AF1  | NM_006235    | J02043 | 714430 |
| MLL1     | NM_005934    | J02370 | 715135 |
| ARHGAP25 | NM_001007231 | T04228 | 715281 |
| FBXW4    | NM_022039    | T04228 | 723954 |
| CASC5    | NM_144508    | T04228 | 726288 |
| FANCG    | NM_004629    | J02370 | 726905 |
| GADD45G  | NM_006705    | J02370 | 728813 |
| ZDHHC14  | NM_024630    | K05079 | 737861 |
| PTPN11   | NM_002834    | T04228 | 756104 |
| KDSR     | NM_002035    | T04228 | 757712 |
| SOX8     | NM_014587    | J02043 | 761903 |
| BCL9     | NM_004326    | J02043 | 766373 |
| PECAM1   | NM_000442    | J02043 | 773445 |
| SOX8     | NM_014587    | J02043 | 774519 |
| HSP90AA1 | NM_001017963 | J02370 | 777422 |
| ICAM1    | NM_000201    | J02370 | 784406 |
| SEPT9    | NM_006640    | J02043 | 787437 |
| IER2     | NM_004907    | K05079 | 792458 |
| PIM3     | NM_001001852 | J02043 | 794159 |
| NAPA     | NM_003827    | J02370 | 798767 |
| MALT1    | NM_006785    | T04228 | 805220 |
| NAPA     | NM_003827    | J02043 | 815374 |
| SEPT9    | NM_006640    | J02043 | 815678 |
| SLC38A1  | NM_030674    | J02043 | 829307 |
| PAX5     | NM_016734    | J02370 | 835828 |
| SPI1     | NM_003120    | T04228 | 840973 |

|           |              |        |         |
|-----------|--------------|--------|---------|
| FGR       | NM_005248    | J02043 | 847366  |
| BTG2      | NM_006763    | J02043 | 870921  |
| CD6       | NM_006725    | J02043 | 871926  |
| FGR       | NM_005248    | J02043 | 883396  |
| FGR       | NM_005248    | J02043 | 883619  |
| RRAS2     | NM_012250    | J02043 | 888848  |
| NRAS      | NM_002524    | J02370 | 929078  |
| ID2       | NM_002166    | J02370 | 946866  |
| TNFRSF13B | NM_012452    | J02043 | 950724  |
| RNASE10   | NM_001012975 | J02370 | 951591  |
| BMI1      | NM_005180    | J02043 | 964757  |
| KCTD2     | NM_015353    | J02043 | 965183  |
| NCOR2     | NM_006312    | J02043 | 976503  |
| NAPA      | NM_003827    | J02043 | 1039390 |
| TOB2      | NM_016272    | J02043 | 1041368 |
| WAS       | NM_000377    | J02043 | 1043798 |
| LTB       | NM_002341    | J02043 | 1044887 |
| SH3GL1    | NM_003025    | J02043 | 1056748 |
| C1orf164  | NM_018150    | J02370 | 1058046 |
| TTL       | NM_153712    | T04228 | 1064771 |
| RHOH      | NM_004310    | T04228 | 1069871 |
| RASGRP1   | NM_005739    | J02043 | 1076992 |
| PLCH2     | NM_014638    | J02043 | 1078481 |
| SEPT9     | NM_006640    | J02370 | 1080373 |
| UBE2D2    | NM_003339    | T04228 | 1080558 |
| ERC2      | NM_015576    | J02043 | 1086927 |
| CORO1A    | NM_007074    | J02043 | 1097035 |
| FBXL10    | NM_032590    | J02043 | 1097086 |
| BCL3      | NM_005178    | J02043 | 1107870 |
| FANCE     | NM_021922    | J02043 | 1145032 |
| SEPT9     | NM_006640    | J02370 | 1146250 |
| NUMA1     | NM_006185    | J02370 | 1153668 |
| FANCE     | NM_021922    | J02043 | 1157073 |
| NCOR2     | NM_006312    | T04228 | 1158654 |
| CASC5     | NM_144508    | J02043 | 1159104 |
| PPP1R14B  | NM_138689    | J02043 | 1181011 |
| ZMYM2     | NM_003453    | J02043 | 1190481 |
| MLL1      | NM_005934    | J02043 | 1206080 |
| RPN1      | NM_002950    | J02043 | 1207945 |
| HMGCR     | NM_000859    | J02043 | 1213376 |
| RGS19     | NM_001039467 | J02370 | 1214677 |
| CARS      | NM_001014437 | J02043 | 1235088 |
| WAS       | NM_000377    | J02043 | 1238956 |
| PPP1R14B  | NM_138689    | J02370 | 1243903 |
| ME3       | NM_006680    | J02043 | 1244190 |
| FBXL10    | NM_032590    | J02043 | 1276196 |
| C1orf164  | NM_018150    | J02043 | 1313600 |
| DTX3      | NM_178502    | J02043 | 1319037 |
| TNFRSF13B | NM_012452    | J02370 | 1364503 |
| FBXW7     | NM_033632    | J02043 | 1364809 |
| ABTB2     | NM_145804    | J02370 | 1364881 |
| NAPA      | NM_003827    | J02043 | 1386731 |
| DTX3      | NM_178502    | J02043 | 1398288 |
| DTX3      | NM_178502    | J02043 | 1403172 |
| DTX3      | NM_178502    | J02043 | 1415300 |
| CUTL1     | NM_001913    | T04228 | 1437059 |
| BTG1      | NM_001731    | J02043 | 1456517 |
| BCL11A    | NM_018014    | K05079 | 1479747 |
| PRRX1     | NM_006902    | J02043 | 1530512 |
| TOB2      | NM_016272    | J02043 | 1577482 |
| IL17RB    | NM_018725    | J02043 | 1592046 |
| LTB       | NM_002341    | J02043 | 1596292 |
| CUTL1     | NM_001913    | J02043 | 1609750 |
| RSPH10B   | NM_173565    | T04228 | 1613042 |
| MN1       | NM_002430    | T04228 | 1630808 |
| ICAM1     | NM_000201    | J02043 | 1634080 |

|          |              |        |         |
|----------|--------------|--------|---------|
| ICAM1    | NM_000201    | J02043 | 1634706 |
| SMAD3    | NM_005902    | J02370 | 1636727 |
| TNFRSF8  | NM_001243    | J02043 | 1643631 |
| CUTL1    | NM_001913    | J02370 | 1674049 |
| BTG1     | NM_001731    | J02370 | 1712697 |
| ICAM1    | NM_000201    | J02043 | 1724005 |
| RAP1GDS1 | NM_021159    | T04228 | 1737565 |
| MAF      | NM_001031804 | J02043 | 1739020 |
| TP53RK   | NM_033550    | J02370 | 1750268 |
| PECAM1   | NM_000442    | T04228 | 1760122 |
| MCM5     | NM_006739    | M05189 | 1771183 |
| MLLT1    | NM_005934    | J02370 | 1774585 |
| ALK      | NM_004304    | J02043 | 1794811 |
| NIN      | NM_020921    | J02043 | 1845583 |
| ABL1     | NM_007313    | J02043 | 1949350 |
| CEBPA    | NM_004364    | J02043 | 2014678 |
| PTPRE    | NM_006504    | J02370 | 2085839 |
| RUNX2    | NM_001015051 | J02043 | 2105132 |
| NAPA     | NM_003827    | J02043 | 2137493 |
| JAK1     | NM_002227    | T04228 | 2209324 |
| BSPRY    | NM_017688    | J02370 | 2279735 |
| PLAG1    | NM_002655    | J02043 | 2288295 |
| TFPT     | NM_013342    | J02370 | 2376014 |
| TCF12    | NM_003205    | J02043 | 2393628 |
| MAP4K2   | NM_004579    | J02043 | 2399581 |
| PLEK2    | NM_016445    | T04228 | 2419107 |
| AFF3     | NM_002285    | J02043 | 2474963 |
| CASC5    | NM_144508    | T04228 | 2492856 |
| SATB1    | NM_002971    | J02043 | 2512699 |
| LACTB    | NM_032857    | J02043 | 2515612 |
| MN1      | NM_002430    | T04228 | 2591239 |
| MLLT3    | NM_004529    | T04228 | 2599475 |
| SATB1    | NM_002971    | J02043 | 2601088 |
| TAF15    | NM_003487    | J02043 | 2661779 |
| ID3      | NM_002167    | J02370 | 2662457 |
| SBDS     | NM_016038    | J02370 | 2698466 |
| SNX5     | NM_152227    | J02043 | 2739503 |
| CAPG     | NM_001747    | J02370 | 2775089 |
| NAPA     | NM_003827    | J02043 | 2785759 |
| CASC5    | NM_144508    | J02043 | 2947860 |
| HOXD13   | NM_000523    | J02043 | 2959221 |
| PTPRE    | NM_006504    | J02370 | 2961991 |
| UBL7     | NM_201265    | J02370 | 3030562 |
| IL16     | NM_172217    | J02043 | 3123307 |
| SDCCAG8  | NM_006642    | J02043 | 3168672 |
| PRLR     | NM_000949    | T04228 | 3193481 |
| RMND5B   | NM_022762    | J02043 | 3247589 |
| HPSE     | NM_006665    | J02043 | 3314913 |
| RAP1B    | NM_001010942 | J02043 | 3342824 |
| RPN1     | NM_002950    | J02043 | 3380153 |
| HOXD13   | NM_000523    | J02370 | 3429695 |
| SLC30A5  | NM_022902    | T04228 | 3474112 |
| NUMA1    | NM_006185    | M05189 | 3513139 |
| RAMP1    | NM_005855    | J02043 | 3553548 |
| ANKRD44  | NM_153697    | J02370 | 3558174 |
| MAP3K8   | NM_005204    | T04228 | 3875729 |
| DST      | NM_183380    | T04228 | 3886361 |
| FBXW7    | NM_033632    | J02043 | 3909063 |
| RBL2     | NM_005611    | J02043 | 3918750 |
| SOX3     | NM_005634    | J02043 | 3921430 |
| LCP1     | NM_002298    | J02043 | 4030154 |
| ZNF521   | NM_015461    | J02370 | 4043640 |
| EVI1     | NM_005241    | T04228 | 4059047 |
| STK38L   | NM_015000    | J02043 | 4084454 |
| CASC5    | NM_144508    | J02043 | 4093159 |
| PIM3     | NM_001001852 | J02370 | 4152731 |

|                              |              |        |          |
|------------------------------|--------------|--------|----------|
| BTG1                         | NM_001731    | T04228 | 4222852  |
| STK38L                       | NM_015000    | J02043 | 4290683  |
| FBXW7                        | NM_033632    | J02043 | 4436121  |
| BCL2L1                       | NM_001191    | J02043 | 4504022  |
| ZNF239                       | NM_005674    | T04228 | 4520568  |
| DTX3                         | NM_178502    | J02043 | 4542471  |
| BRCA2                        | NM_000059    | T04228 | 4579789  |
| BRCA2                        | NM_000059    | T04228 | 4629285  |
| PICALM                       | NM_001008660 | J02043 | 4691893  |
| LRMP                         | NM_006152    | J02043 | 4759913  |
| ALG14                        | NM_144988    | T04228 | 4776080  |
| NFKBIA                       | NM_020529    | J02043 | 4779531  |
| GPHN                         | NM_001024218 | J02043 | 4830033  |
| EIF1B                        | NM_005875    | J02043 | 5467136  |
| TNFSF13B                     | NM_006573    | J02043 | 5536031  |
| SLC9A9                       | NM_173653    | J02043 | 6085508  |
| EIF1B                        | NM_005875    | J02370 | 6256067  |
| ACTB                         | NM_001101    | T04228 | 6310717  |
| MID1                         | NM_000381    | J02043 | 6335276  |
| RPN1                         | NM_002950    | M05189 | 6507292  |
| ZNF521                       | NM_015461    | J02043 | 6669656  |
| ZNF608                       | NM_020747    | M05189 | 6893948  |
| C1orf55                      | NM_152608    | J02043 | 6903820  |
| MYB                          | NM_005375    | J02370 | 7387566  |
| RUNX1T1                      | NM_175635    | M05189 | 7438854  |
| FHIT                         | NM_002012    | J02043 | 7650505  |
| NCOR2                        | NM_006312    | J02043 | 7735542  |
| MYB                          | NM_005375    | J02370 | 8007257  |
| RPN1                         | NM_002950    | J02370 | 8667764  |
| EIF1B                        | NM_005875    | J02043 | 8848950  |
| ZNF521                       | NM_015461    | J02043 | 9205895  |
| TFG                          | NM_001007565 | J02043 | 9385358  |
| JAKMIP1                      | NM_144720    | T04228 | 9966752  |
| RPN1                         | NM_002950    | T04228 | 10002836 |
| CDK6                         | NM_001259    | J02043 | 10025440 |
| SEPT6                        | NM_145800    | J02043 | 11128848 |
| LNPEP                        | NM_005575    | M05189 | 12112950 |
| PRLR                         | NM_000949    | M05189 | 16430660 |
| LCP1                         | NM_002298    | J02043 | 19246341 |
| CDK6                         | NM_001259    | J02043 | 21520851 |
| PRLR                         | NM_000949    | J02043 | 34639751 |
| <b>Average Distance (bp)</b> |              |        | 1578937  |

**Bold and italic are unique RIS within proto-oncogenes**

**All unique RIS are listed once with only the nearest proto-oncogene TSS**

**Supplemental Table 5 Closest proto-oncogene promoter to unique RIS after drug treatment**

| Gene Abbreviation | RefSeq           | Monkey        | Distance (bp) |
|-------------------|------------------|---------------|---------------|
| MCL1              | NM_021960        | J02370        | 380           |
| <b>PIM1</b>       | <b>NM_002648</b> | <b>J02043</b> | <b>4786</b>   |
| <b>EP300</b>      | <b>NM_001429</b> | <b>K05079</b> | <b>16046</b>  |
| FRMD8             | NM_031904        | J02370        | 21869         |
| LYL1              | NM_005583        | J02370        | 23015         |
| GPX1              | NM_000581        | J02370        | 25875         |
| ETS1              | NM_005238        | K05079        | 28589         |
| PPP1R14B          | NM_138689        | J02370        | 28747         |
| DDX6              | NM_004397        | J02043        | 36637         |
| <b>USP3</b>       | <b>NM_006537</b> | <b>J02043</b> | <b>39056</b>  |
| JUNB              | NM_002229        | J02370        | 49332         |
| MRV11             | NM_130385        | J02043        | 55508         |
| NOTCH1            | NM_017617        | J02370        | 101980        |
| CLP1              | NM_006831        | J02043        | 138987        |
| RGS19             | NM_001039467     | J02370        | 160136        |
| MEF2B             | NM_005919        | K05079        | 162150        |
| NAPA              | NM_003827        | J02043        | 170266        |
| FANCE             | NM_021922        | J02370        | 185956        |
| STK11             | NM_000455        | J02370        | 195126        |
| EPS15L1           | NM_021235        | K05079        | 208527        |
| CLTCL1            | NM_007098        | J02043        | 243358        |
| HIST1H4I          | NM_003495        | J02043        | 247255        |
| LTB               | NM_002341        | J02043        | 253332        |
| NAPA              | NM_003827        | J02370        | 258013        |
| NCKIPSD           | NM_016453        | J02043        | 259535        |
| TPM3              | NM_001043351     | K05079        | 274434        |
| PFN1              | NM_005022        | J02043        | 275444        |
| MSN               | NM_002444        | K05079        | 365233        |
| FANCA             | NM_000135        | J02370        | 386981        |
| EPOR              | NM_000121        | J02043        | 393360        |
| PIM3              | NM_001001852     | J02043        | 393400        |
| FANCG             | NM_004629        | J02370        | 409475        |
| TCIRG1            | NM_006019        | K05079        | 423973        |
| TRAF1             | NM_005658        | K05079        | 432949        |
| MAP3K8            | NM_005204        | J02043        | 521694        |
| MEF2D             | NM_005920        | J02043        | 532490        |
| WHSC1L1           | NM_023034        | J02043        | 535767        |
| SOX8              | NM_014587        | K05079        | 622387        |
| RPL22             | NM_000983        | J02043        | 638452        |
| NFATC3            | NM_004555        | J02043        | 662723        |
| KCTD2             | NM_015353        | J02043        | 670505        |
| MEF2B             | NM_005919        | J02043        | 721937        |
| SOX8              | NM_014587        | J02370        | 747171        |
| SOX8              | NM_014587        | J02043        | 774519        |
| MTCP1             | NM_001018024     | J02370        | 777797        |
| IER2              | NM_004907        | K05079        | 792458        |
| NAPA              | NM_003827        | J02043        | 815374        |
| FGR               | NM_005248        | J02043        | 883619        |
| CCR1              | NM_001295        | K05079        | 886547        |
| ID2               | NM_002166        | J02370        | 946866        |
| SEPT6             | NM_145800        | J02043        | 947784        |
| RSPH10B           | NM_173565        | J02370        | 1082616       |
| EPS15             | NM_001981        | J02370        | 1188761       |
| SOX8              | NM_014587        | J02043        | 1220786       |
| PPP1R14B          | NM_138689        | J02370        | 1243903       |
| SPI1              | NM_003120        | K05079        | 1305473       |
| C1orf164          | NM_018150        | J02043        | 1313600       |
| TNFRSF13B         | NM_012452        | J02370        | 1364503       |
| ABTB2             | NM_145804        | J02370        | 1364881       |
| ABTB2             | NM_145804        | J02043        | 1365033       |
| DTX3              | NM_178502        | K05079        | 1484576       |
| IL17RB            | NM_018725        | J02043        | 1592046       |
| IL17RB            | NM_018725        | K05079        | 1716350       |

|                              |           |        |          |
|------------------------------|-----------|--------|----------|
| MARCH3                       | NM_178450 | J02370 | 2033162  |
| PTPRE                        | NM_006504 | J02370 | 2085839  |
| PADI2                        | NM_007365 | J02370 | 2134869  |
| PADI2                        | NM_007365 | J02043 | 2391959  |
| LEF1                         | NM_016269 | J02370 | 2710566  |
| ARHGEF12                     | NM_015313 | J02043 | 2722424  |
| SNX5                         | NM_152227 | J02043 | 2739503  |
| NAPA                         | NM_003827 | K05079 | 2769916  |
| RMND5B                       | NM_022762 | K05079 | 2959576  |
| ANKRD44                      | NM_153697 | J02370 | 3429361  |
| MN1                          | NM_002430 | J02043 | 3783174  |
| RBL2                         | NM_005611 | J02043 | 3918750  |
| SLC9A9                       | NM_173653 | J02043 | 5306035  |
| SEPT6                        | NM_145800 | J02043 | 11128848 |
| TIAM1                        | NM_003253 | J02043 | 11426350 |
| <b>Average Distance (bp)</b> |           |        | 1237573  |

Bold and italic are unique RIS within proto-oncogenes

All unique RIS are listed once with only the nearest proto-oncogene TSS

**Supplemental Table 6 Unique RIS isolated both before and after drug treatment**

| <b>Gene Abbreviation</b>     | <b>RefSeq</b>           | <b>Monkey</b>        | <b>Distance (bp)</b> |
|------------------------------|-------------------------|----------------------|----------------------|
| MCL1                         | NM_021960               | J02370               | 380                  |
| LYL1                         | NM_005583               | J02370               | 23015                |
| PPP1R14B                     | NM_138689               | J02370               | 28747                |
| DDX6                         | NM_004397               | J02043               | 36637                |
| <b><i>USP3</i></b>           | <b><i>NM_006537</i></b> | <b><i>J02043</i></b> | <b><i>39056</i></b>  |
| RGS19                        | NM_001039467            | J02370               | 160136               |
| FANCE                        | NM_021922               | J02370               | 185956               |
| HIST1H4I                     | NM_003495               | J02043               | 247255               |
| NCKIPSD                      | NM_016453               | J02043               | 259535               |
| PFN1                         | NM_005022               | J02043               | 275444               |
| FANCA                        | NM_000135               | J02370               | 386981               |
| PIM3                         | NM_001001852            | J02043               | 393400               |
| FANCG                        | NM_004629               | J02370               | 409475               |
| MAP3K8                       | NM_005204               | J02043               | 521694               |
| MEF2D                        | NM_005920               | J02043               | 532490               |
| WHSC1L1                      | NM_023034               | J02043               | 535767               |
| RPL22                        | NM_000983               | J02043               | 638452               |
| SOX8                         | NM_014587               | J02043               | 774519               |
| IER2                         | NM_004907               | K05079               | 792458               |
| NAPA                         | NM_003827               | J02043               | 815374               |
| FGR                          | NM_005248               | J02043               | 883619               |
| ID2                          | NM_002166               | J02370               | 946866               |
| PPP1R14B                     | NM_138689               | J02370               | 1243903              |
| C1orf164                     | NM_018150               | J02043               | 1313600              |
| TNFRSF13B                    | NM_012452               | J02370               | 1364503              |
| ABTB2                        | NM_145804               | J02370               | 1364881              |
| IL17RB                       | NM_018725               | J02043               | 1592046              |
| PTPRE                        | NM_006504               | J02370               | 2085839              |
| SNX5                         | NM_152227               | J02043               | 2739503              |
| RBL2                         | NM_005611               | J02043               | 3918750              |
| SEPT6                        | NM_145800               | J02043               | 11128848             |
| <b>Average Distance (bp)</b> |                         |                      | 1149649              |

Bold and italic are unique RIS within proto-oncogenes



**Supplemental Figure 1**

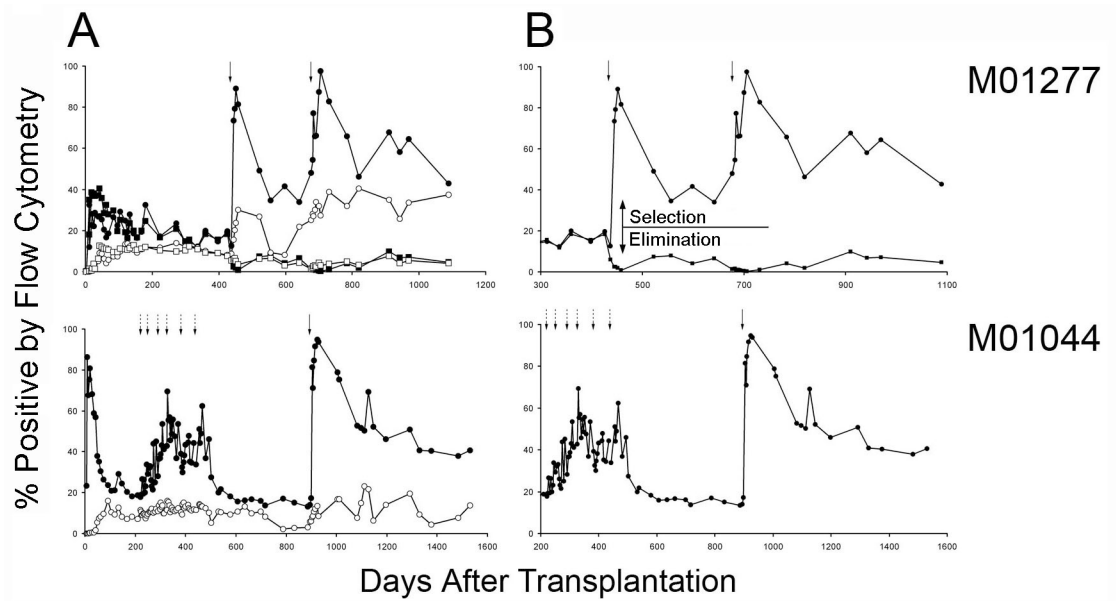

**Supplemental Figure 1. Efficient MGMP140K-mediated in vivo selection in the baboon (M01277 and M01044).** The left panels (A) show gene marking in MGMP140K-GFP granulocytes (closed circle), MGMP140K-GFP lymphocytes (open circle), YFP granulocytes (closed square), and YFP lymphocytes (open square) before and after in vivo selection with either O<sup>6</sup>BG and TMZ (dashed arrow) or BCNU (solid arrow). The right panels (B) show a truncated representation of the time following in vivo selection with O<sup>6</sup>BG-2X and TMZ or BCNU. Granulocytes are the only subset represented for clarity of selection (MGMP140K-GFP) and elimination (YFP).

## Supplemental Figure 2

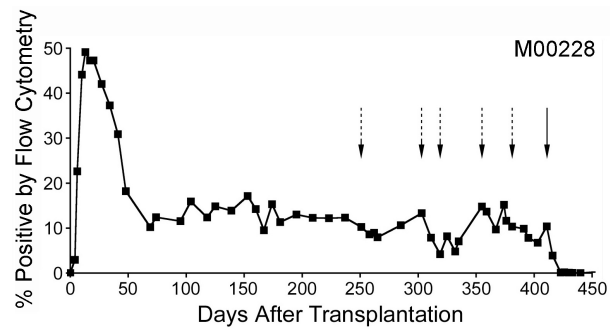

**Supplemental Figure 2. Pronounced elimination of unprotected YFP-only gene modified cells after O<sup>6</sup>BG and BCNU, but not multiple doses of O<sup>6</sup>BG and TMZ (M00228).** Truncated gene marking plot of the YFP-only granulocytes pictured in Figure 1A and 1B. Gene marking in YFP-only granulocytes (closed square), before and after in vivo selection with either O<sup>6</sup>BG and TMZ (dashed arrows) or O<sup>6</sup>BG-2X and BCNU (solid arrow).

### Supplemental Figure 3

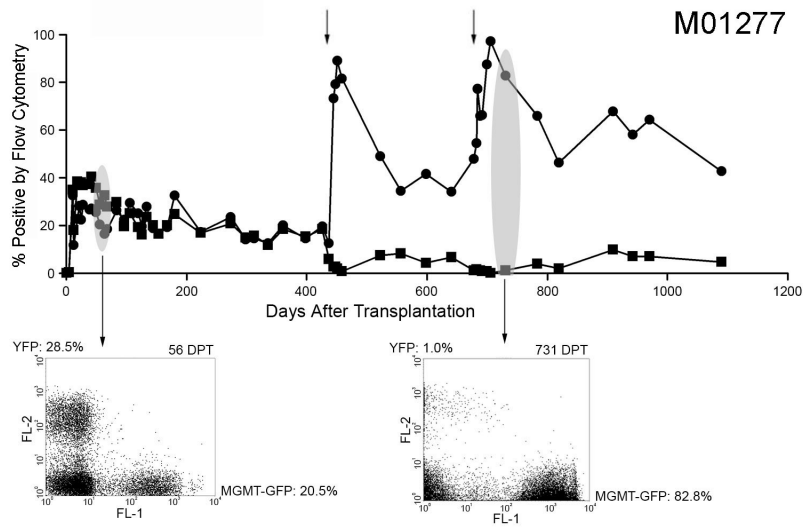

**Supplemental Figure 3. Representative flow cytometry of gene marked cells before and after MGMTP140K-mediated in vivo selection (M01277).** The upper panel (A) is gene marking in MGMT-GFP granulocytes (closed circle) and YFP-only granulocytes (closed squares). Gray shaded ovals correspond to time points of the representative flow cytometry plots showing GFP and YFP gene marking before and after in vivo selection with O<sup>6</sup>BG-2X and BCNU (solid arrow).

## Supplemental Figure 4

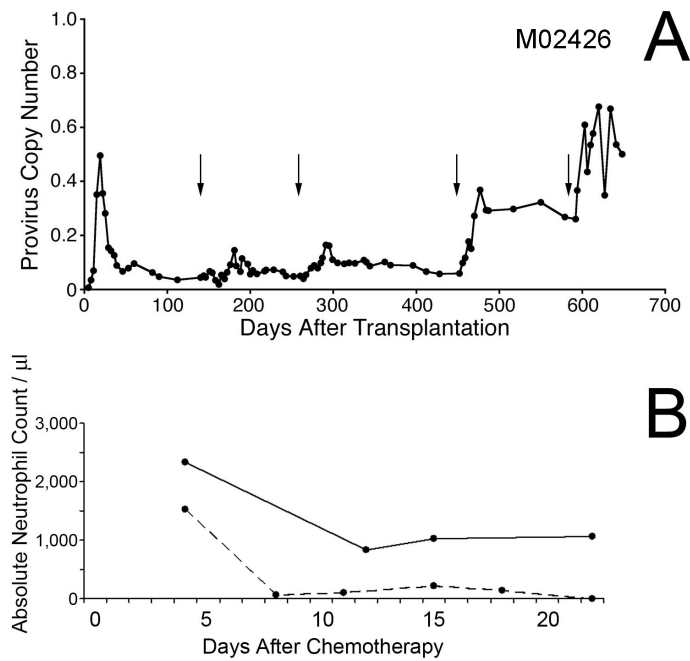

**Supplemental Figure 4. Efficient MGMP140K-mediated in vivo selection and chemoprotection in the macaque (M02426).** Panel (A) Gene marking plotted as provirus copy number from whole white blood cells before and after in vivo selection of MGMP140K-GFP gene-marked cells in a macaque. Treatment with O<sup>6</sup>BG-2X and BCNU denoted by solid arrows. Panel (B) is a representation of the absolute neutrophil count plotted as days after **drug treatment** in the macaque represented in panel A following the final O<sup>6</sup>BG and BCNU treatment (day 588). Gene marking in the macaque was 0.27 provirus copies and the **drug** dose was 120 mg/m<sup>2</sup> O<sup>6</sup>BG-2X and 30 mg/m<sup>2</sup> BCNU (black solid line). There was no MGMP140K gene marking in the control macaque and the **drug** dose was 120 mg/m<sup>2</sup> O<sup>6</sup>BG-2X and 25 mg/m<sup>2</sup> BCNU (black dashed line).

**Supplemental Figure 5**

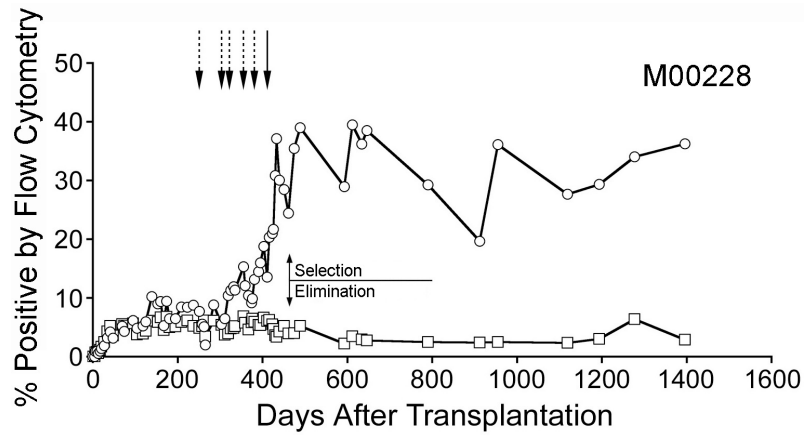

**Supplemental Figure 5. Efficient MGMTP140K-mediated in vivo selection of gene marked lymphocytes in the baboon (M00228).** Gene marking in MGMTP140K-GFP lymphocytes (open circle) and YFP lymphocytes (open square) before and after in vivo selection with either O<sup>6</sup>BG and TMZ (dashed arrows) or O<sup>6</sup>BG-2X and BCNU (solid arrow).
